# Supplementary material for: Recruitment and positioning determine the specific role of the XPF‐ERCC1 endonuclease in interstrand crosslink repair
Source: PubMed Central journal article supplement (PMC5510004; doi:10.15252/embj.201695223), 2017-03-14
Supplement: EMBJ-36-2034-s006.pdf [file EMBJ-36-2034-s006.pdf]

B

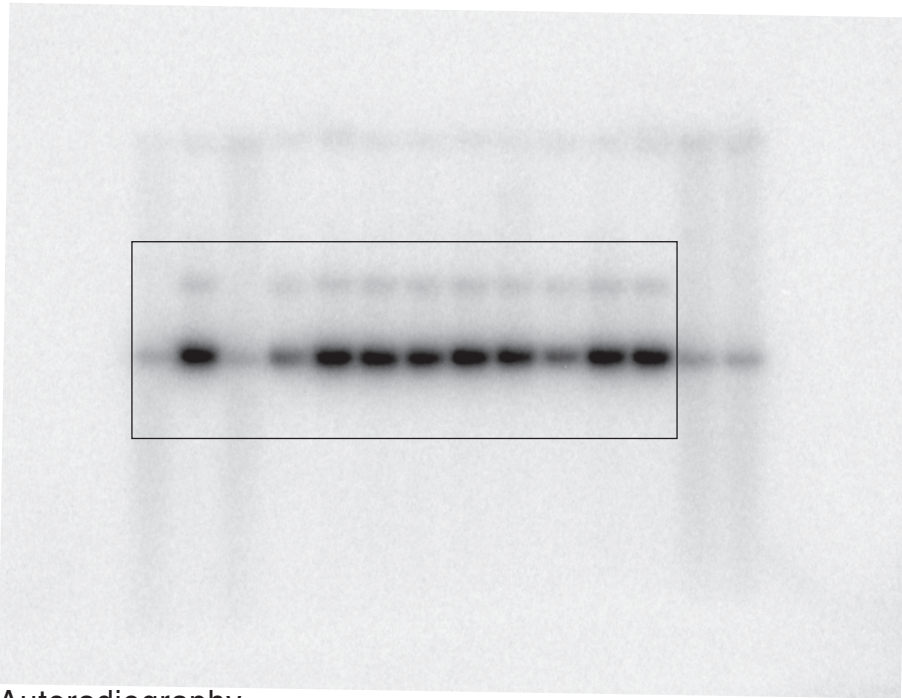

Autoradiography

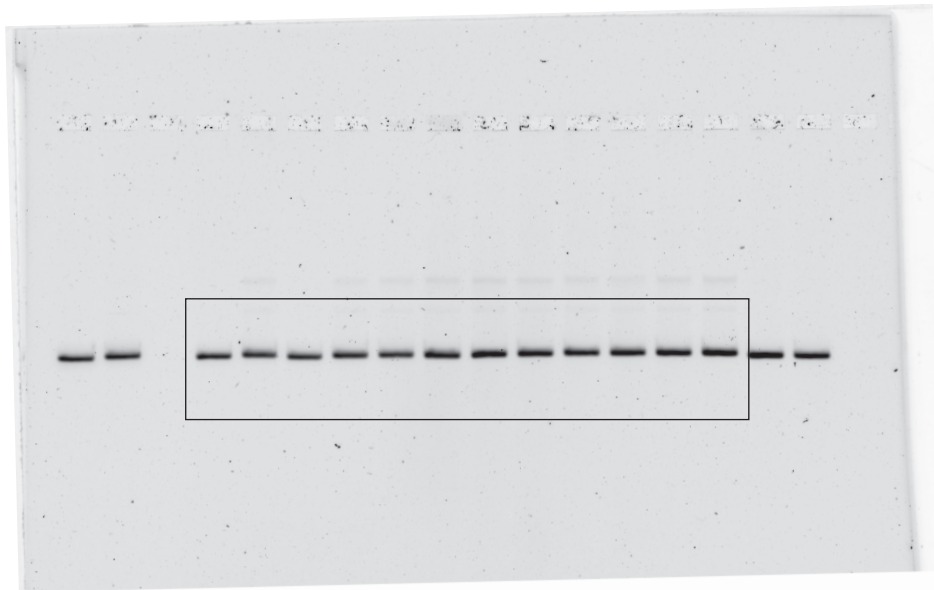

Sybr Gold
