# Supplementary material for: Recruitment and positioning determine the specific role of the XPF‐ERCC1 endonuclease in interstrand crosslink repair
Source: PubMed Central journal article supplement (PMC5510004; doi:10.15252/embj.201695223), 2017-03-14
Supplement: EMBJ-36-2034-s007.pdf [file EMBJ-36-2034-s007.pdf]

Source data Fig 6

**B** Top panel

Blot 1

Blot 2

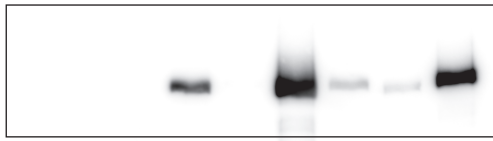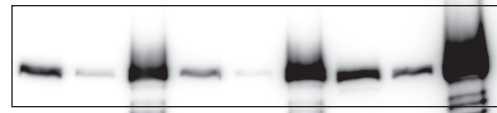

— FLAG-XPF

**αFLAG**

Including colorimetric marker overlay from AI 600 imager (GE)

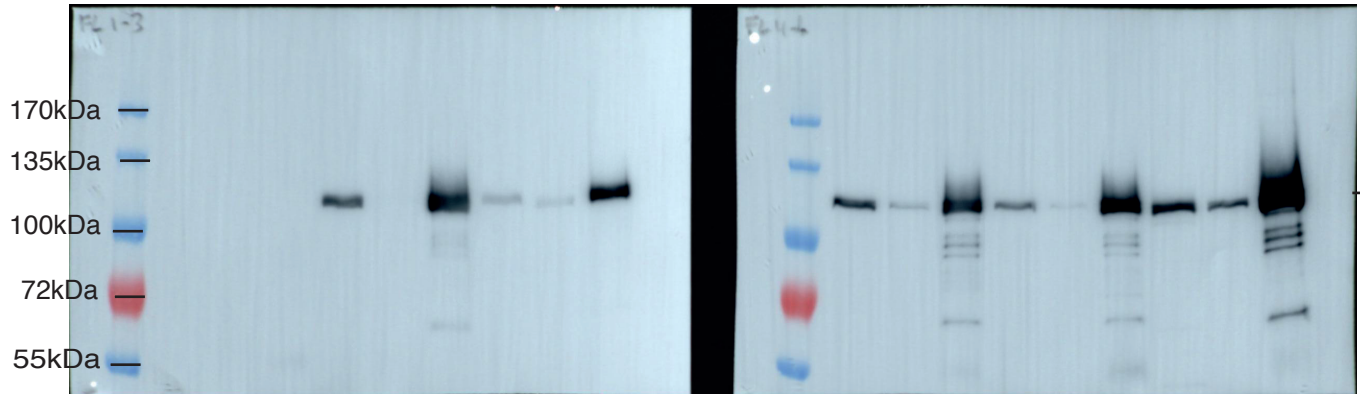

— FLAG-XPF

Bottom panel

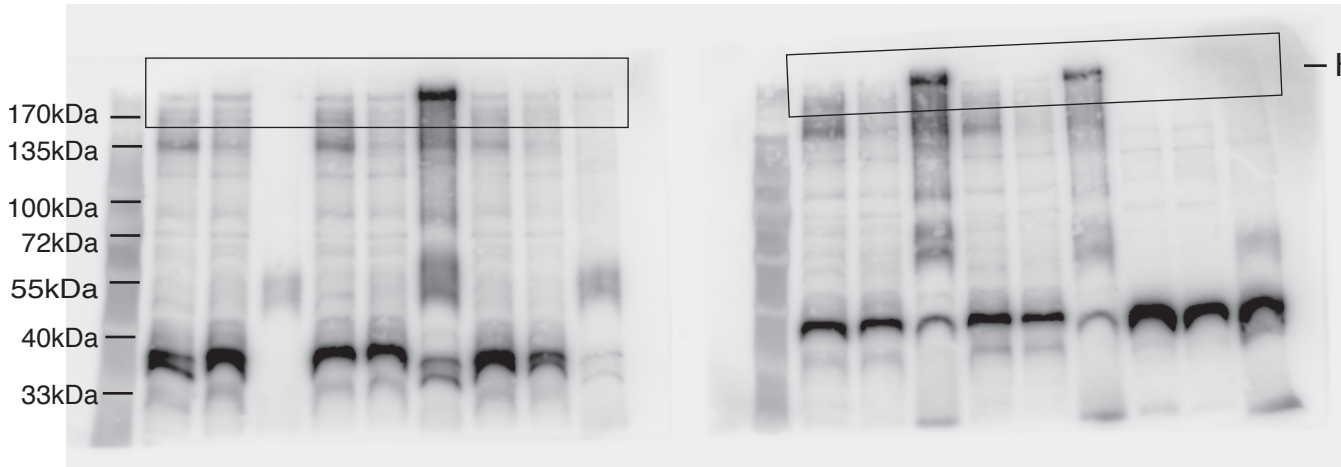

— His-SLX4

**αHIS**

**D** Top panel

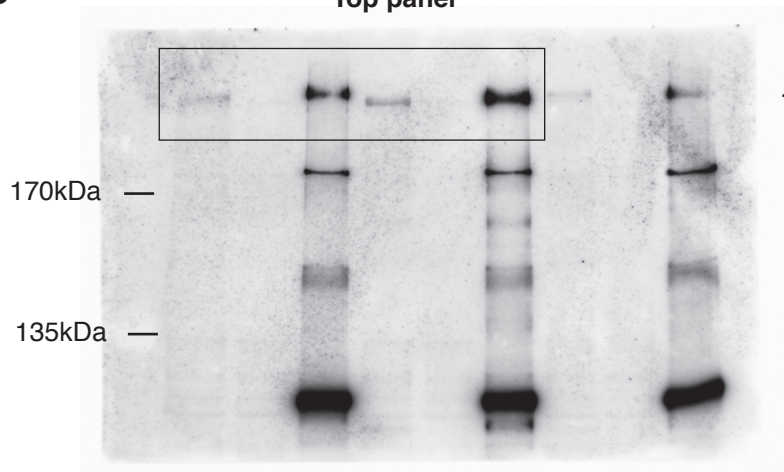

— FLAG-SLX4

170kDa —

135kDa —

**αFLAG**

**Bottom panel**

170kDa —

135kDa —

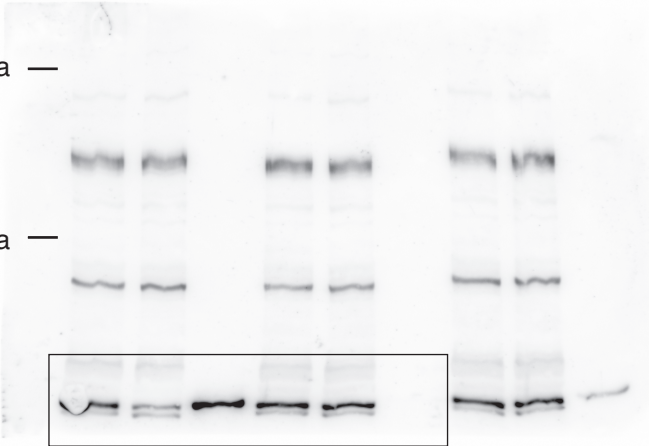

— XPF

**$\alpha$ XPF**
